# Supplementary material for: Self-reported olfactory and gustatory dysfunctions in COVID-19 patients: a 1-year follow-up study in Foggia district, Italy
Source: Springer Nature journal article supplement (doi:10.1186/s12879-022-07052-8), 2022-01-22
Supplement: MOESM1 [file 20058696]

**Additional file 1. Univariate analysis of variables associated with self-reported chemosensory dysfunctions in COVID-19 cases. District of Foggia (Apulia region, Italy), March 1<sup>st</sup> - June 16<sup>th</sup>, 2020**

|                                       | Olfactory dysfunction |             |                     |            | Gustatory dysfunction |             |                     |            | At least one sensory dysfunction |             |                     |            |
|---------------------------------------|-----------------------|-------------|---------------------|------------|-----------------------|-------------|---------------------|------------|----------------------------------|-------------|---------------------|------------|
|                                       | Yes                   | No          | OR<br>[95% CI]      | p<br>value | Yes                   | No          | OR<br>[95% CI]      | p<br>value | Yes                              | No          | OR<br>[95% CI]      | p<br>value |
| <b>Sex</b>                            |                       |             |                     |            |                       |             |                     |            |                                  |             |                     |            |
| Male, n (%)                           | 71 (31.7)             | 153 (68.3)  | 0.70<br>[0.47-1.03] | 0.0641     | 73 (32.6)             | 151 (67.4)  | 0.66<br>[0.45-0.98] | 0.0317     | 84 (37.5)                        | 140 (62.5)  | 0.75<br>[0.51-1.10] | 0.1273     |
| Female, n (%)                         | 105 (39.8)            | 159 (60.2)  |                     |            | 111 (42.0)            | 153 (58.0)  |                     |            | 117 (44.3)                       | 147 (55.7)  |                     |            |
| <b>Age (years)</b>                    |                       |             |                     |            |                       |             |                     |            |                                  |             |                     |            |
| Mean (SD)                             | 43.5 (14.7)           | 42.1 (18.8) | -                   | 0.1967     | 43.5 (14.6)           | 42.1 (18.9) | -                   | 0.1955     | 43.4 (14.7)                      | 42.0 (19.1) | -                   | 0.1904     |
| Median (IQR)                          | 45 (32-53)            | 44 (28-56)  | -                   | -          | 45 (32-55)            | 44 (28-56)  | -                   | -          | 45 (32-55)                       | 44 (28-56)  | -                   | -          |
| <b>Age groups</b>                     |                       |             |                     |            |                       |             |                     |            |                                  |             |                     |            |
| ≥45 years, n (%)                      | 90 (37.3)             | 151 (62.7)  | 1.11<br>[0.75-1.64] | 0.5612     | 94 (39.0)             | 147 (61.0)  | 1.11<br>[0.76-1.63] | 0.5586     | 102 (42.3)                       | 139 (57.7)  | 1.09<br>[0.75-1.59] | 0.6148     |
| <45 years, n (%)                      | 86 (34.8)             | 161 (65.2)  |                     |            | 90 (36.4)             | 157 (63.6)  |                     |            | 99 (40.1)                        | 148 (59.9)  |                     |            |
| <b>Comorbidity</b>                    |                       |             |                     |            |                       |             |                     |            |                                  |             |                     |            |
| None, n (%)                           | 148 (37.1)            | 251 (62.9)  | 0.78<br>[0.46-1.30] | 0.3171     | 153 (38.4)            | 246 (61.6)  | 0.86<br>[0.51-1.42] | 0.5362     | 170 (42.6)                       | 229 (57.4)  | 0.72<br>[0.43-1.19] | 0.1778     |
| At least one comorbidity, n (%)       | 28 (31.5)             | 61 (68.5)   |                     |            | 31 (34.8)             | 58 (65.2)   |                     |            | 31 (34.8)                        | 58 (65.2)   |                     |            |
| <b>Clinical presentation</b>          |                       |             |                     |            |                       |             |                     |            |                                  |             |                     |            |
| Paucisymptomatic, n (%)               | 126 (34.7)            | 237 (65.3)  | 1.25<br>[0.80-1.94] | 0.2882     | 128 (35.3)            | 235 (64.7)  | 1.49<br>[0.96-2.29] | 0.0577     | 141 (38.8)                       | 222 (61.2)  | 1.43<br>[0.94-2.23] | 0.0728     |
| Mild, n (%)                           | 50 (40.0)             | 75 (60.0)   |                     |            | 56 (44.8)             | 69 (55.2)   |                     |            | 60 (48.0)                        | 65 (52.0)   |                     |            |
| <b>Incubation period (days)</b>       |                       |             |                     |            |                       |             |                     |            |                                  |             |                     |            |
| Mean (SD)                             | 8.9 (8.0)             | 9.4 (10.3)  | -                   | 0.3169     | 8.8 (7.7)             | 9.5 (10.5)  | -                   | 0.2395     | 8.7 (7.7)                        | 9.7 (10.7)  | -                   | 0.1492     |
| <b>Time to viral clearance (days)</b> |                       |             |                     |            |                       |             |                     |            |                                  |             |                     |            |
| Mean (SD)                             | 29.1 (12.7)           | 28.5 (12.1) | -                   | 0.3090     | 30.3 (13.5)           | 27.7 (11.3) | -                   | 0.0117     | 29.7 (13.4)                      | 28 (11.5)   | -                   | 0.0690     |

OR: Odds Ratio; CI: Confidence Interval; SD: Standard Deviation; IQR: Interquartile Ranges
