# Supplementary material for: Self-reported olfactory and gustatory dysfunctions in COVID-19 patients: a 1-year follow-up study in Foggia district, Italy
Source: Springer Nature journal article supplement (doi:10.1186/s12879-022-07052-8), 2022-01-22
Supplement: MOESM3 [file 20058696]

**Additional file 3. Multivariate analysis of variables associated with complete recovery of self-reported olfactory and gustatory dysfunctions in COVID-19 cases. District of Foggia (Apulia region, Italy), March 1<sup>st</sup>, 2020 - June 16<sup>th</sup>, 2021**

| Sex                             | Olfactory dysfunction |            |                |         | Gustatory dysfunction |            |                |         | At least one sensory dysfunction |            |                |         |
|---------------------------------|-----------------------|------------|----------------|---------|-----------------------|------------|----------------|---------|----------------------------------|------------|----------------|---------|
|                                 | Yes                   | No         | OR<br>[95% CI] | p value | Yes                   | No         | OR<br>[95% CI] | p value | Yes                              | No         | OR<br>[95% CI] | p value |
| Male, n (%)                     | 16 (34.8)             | 56 (42.4)  | 1.32           | 0.433   | 16 (42.1)             | 56 (40.0)  | 0.87           | 0.723   | 14 (45.2)                        | 58 (39.4)  | 1.41           | 0.316   |
| Female, n (%)                   | 30 (65.2)             | 76 (57.6)  | [0.65-2.68]    |         | 22 (57.9)             | 84 (60.0)  | [0.42-1.83]    |         | 17 (54.8)                        | 89 (60.5)  | [0.71-2.79]    |         |
| <b>Age groups</b>               |                       |            |                |         |                       |            |                |         |                                  |            |                |         |
| ≥45 years, n (%)                | 27 (58.7)             | 62 (47.0)  | 0.60           | 0.157   | 23 (60.5)             | 66 (47.1)  | 0.57           | 0.151   | 18 (58.1)                        | 71 (48.3)  | 0.54           | 0.080   |
| <45 years, n (%)                | 19 (41.3)             | 70 (53.0)  | [0.29-1.21]    |         | 15 (39.5)             | 74 (52.9)  | [0.27-1.22]    |         | 13 (41.9)                        | 76 (51.7)  | [0.28-1.07]    |         |
| <b>Comorbidity</b>              |                       |            |                |         |                       |            |                |         |                                  |            |                |         |
| None, n (%)                     | 39 (84.8)             | 110 (83.3) | 1.29           | 0.595   | 31 (81.6)             | 118 (84.3) | 0.98           | 0.970   | 26 (83.9)                        | 123 (83.7) | 1.11           | 0.816   |
| At least one comorbidity, n (%) | 7 (15.2)              | 22 (16.7)  | [0.49-3.41]    |         | 7 (18.4)              | 22 (15.7)  | [0.37-2.62]    |         | 5 (16.1)                         | 24 (16.3)  | [0.45-2.74]    |         |
| <b>Clinical presentation</b>    |                       |            |                |         |                       |            |                |         |                                  |            |                |         |
| Paucisymptomatic                | 33 (71.7)             | 93 (70.5)  | 1.06           | 0.870   | 27 (71.1)             | 99 (70.7)  | 1.09           | 0.827   | 22 (80.0)                        | 104 (70.7) | 1.09           | 0.811   |
| Mild                            | 13 (28.3)             | 39 (29.5)  | [0.49-2.28]    |         | 11 (28.9)             | 41 (29.3)  | [0.49-2.45]    |         | 9 (20.0)                         | 43 (29.3)  | [0.52-2.27]    |         |

OR: Odds Ratio; CI: Confidence Interval
