# Supplementary material for: Self-reported olfactory and gustatory dysfunctions in COVID-19 patients: a 1-year follow-up study in Foggia district, Italy
Source: BMC Infect Dis. 2022 Jan 22;22:77. doi: 10.1186/s12879-022-07052-8 (PMC8783175; doi:10.1186/s12879-022-07052-8)
Supplement: Supplementary file 2 — Additional file 2: Multivariate analysis of variables associated with self-reported chemosensory dysfunctions in COVID-19 cases. District of Foggia (Apulia region, Italy), March 1st - June 16th, 2020. [file 12879_2022_7052_MOESM2_ESM.pdf]

**Additional file 2. Multivariate analysis of variables associated with self-reported chemosensory dysfunctions in COVID-19 cases. District of Foggia (Apulia region, Italy), March 1<sup>st</sup> - June 16<sup>th</sup>, 2020**

|                                   | Olfactory dysfunction |         | Gustatory dysfunction |         | At least one sensory dysfunction |         |
|-----------------------------------|-----------------------|---------|-----------------------|---------|----------------------------------|---------|
|                                   | OR [95% CI]           | p value | OR (95% CI)           | p value | OR (95% CI)                      | p value |
| <b>Sex</b>                        | 0.69                  | 0.057   | 0.65                  | 0.027   | 0.74                             | 0.106   |
| Male vs. female                   | [0.48-1.01]           |         | [0.45-0.95]           |         | [0.51-1.06]                      |         |
| <b>Age groups</b>                 | 1.16                  | 0.448   | 1.12                  | 0.563   | 1.14                             | 0.477   |
| ≥45 years vs. <45 years           | [0.79-1.71]           |         | [0.76-1.64]           |         | [0.78-1.67]                      |         |
| <b>Comorbidity</b>                | 0.70                  | 0.178   | 0.77                  | 0.304   | 0.64                             | 0.084   |
| None vs. at least one comorbidity | [0.42-1.17]           |         | [0.46-1.27]           |         | [0.39-1.06]                      |         |
| <b>Clinical presentation</b>      | 1.27                  | 0.256   | 1.52                  | 0.050   | 1.49                             | 0.057   |
| Paucisymptomatic vs. mild         | [0.84-1.95]           |         | [0.99-2.31]           |         | [0.98-2.27]                      |         |

OR: Odds Ratio; CI: Confidence Interval
